# Supplementary material for: Rhodamine functionalized mesoporous silica as a chemosensor for the efficient sensing of Al3+, Cr3+ and Fe3+ ions and their removal from aqueous media
Source: Royal Society of Chemistry journal article supplement (doi:10.1039/c9nj03010g), 2019-01-01
Supplement: c9nj03010g1.pdf [file c9nj03010g1.pdf]

## **Rhodamine functionalized mesoporous silica as chemosensor for efficient sensing of $\text{Al}^{3+}$ , $\text{Cr}^{3+}$ and $\text{Fe}^{3+}$ ions and their removal from aqueous medium**

**Debdas Singha,<sup>a</sup> Trisha Das,<sup>a</sup> Lanka Satyanarayana,<sup>b</sup> Partha Roy\*<sup>c</sup> and Mahasweta Nandi\*<sup>a</sup>**

<sup>a</sup>Integrated Science Education and Research Centre, Siksha Bhavana, Visva-Bharati University, Santiniketan-731235, India

E-mail: mahasweta.nandi@visva-bharati.ac.in

<sup>b</sup>Analytical Chemistry Department, CSIR-Indian Institute of Chemical Technology, Uppal Road, Hyderabad 500007, India

<sup>c</sup>Department of Chemistry, Jadavpur University, Jadavpur, Kolkata-700 032, India

E-mail: partha.roy@jadavpuruniversity.in; proy@chemistry.jdvu.ac.in

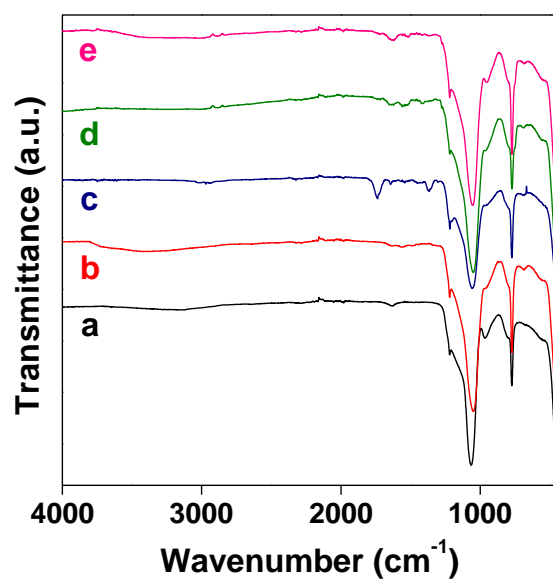

**Fig. s1** FT-IR spectra of (a) SBA-15, (b) APTES functionalized SBA-15, (c) **TFMS**, (d) **RFMS** and (e) Al-bound **RFMS**.

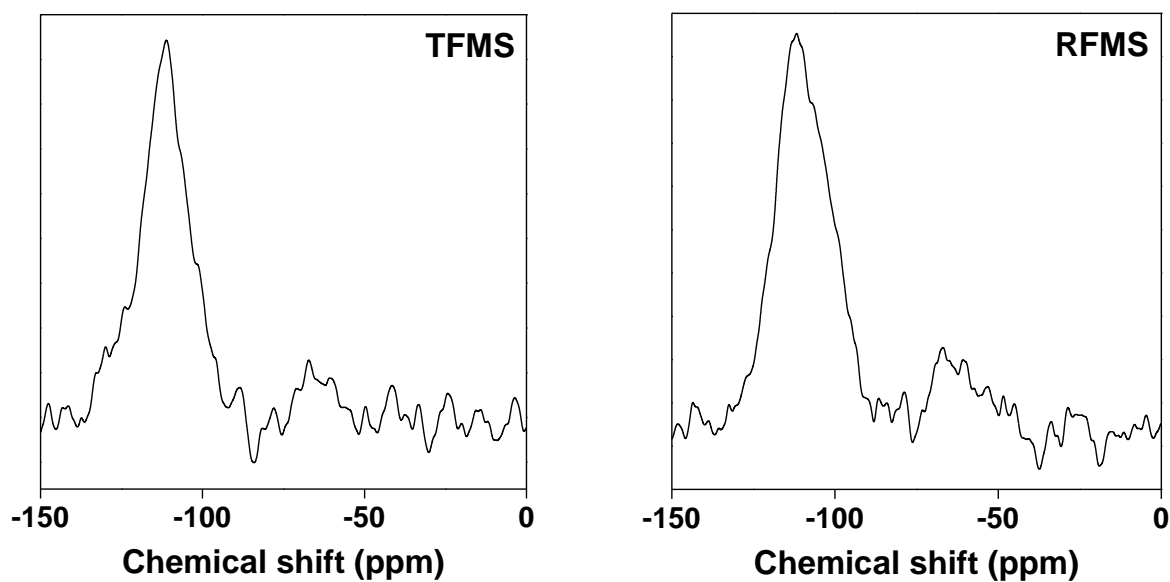

**Fig. s2**  $^{29}\text{Si}$  MAS NMR spectra of **TFMS** and **RFMS**.

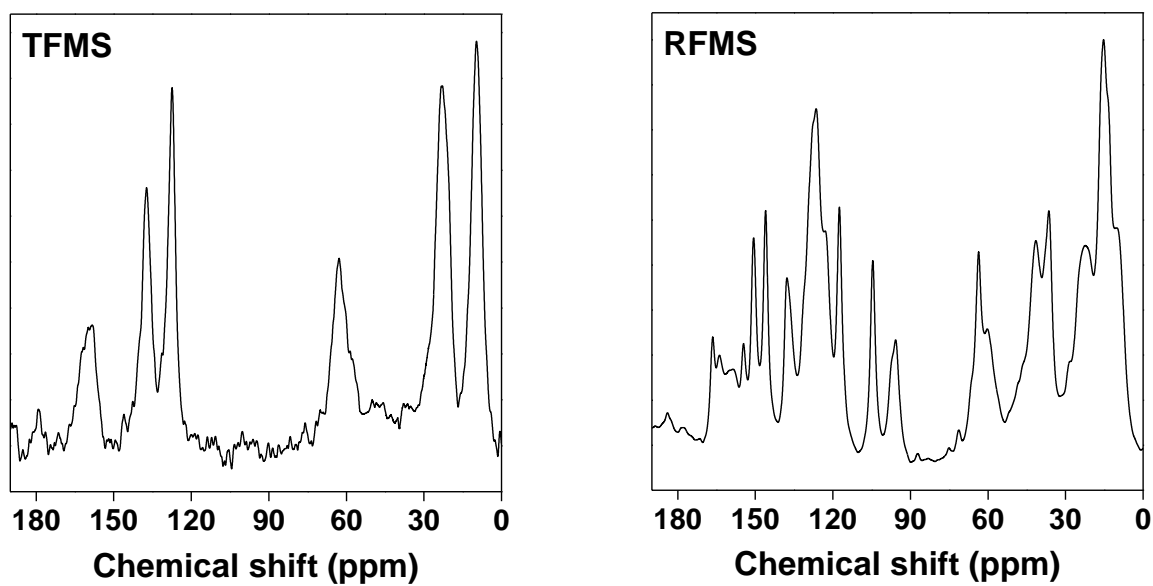

**Fig. s3**  $^{13}\text{C}$  CP MAS NMR spectra of **TFMS** and **RFMS**.

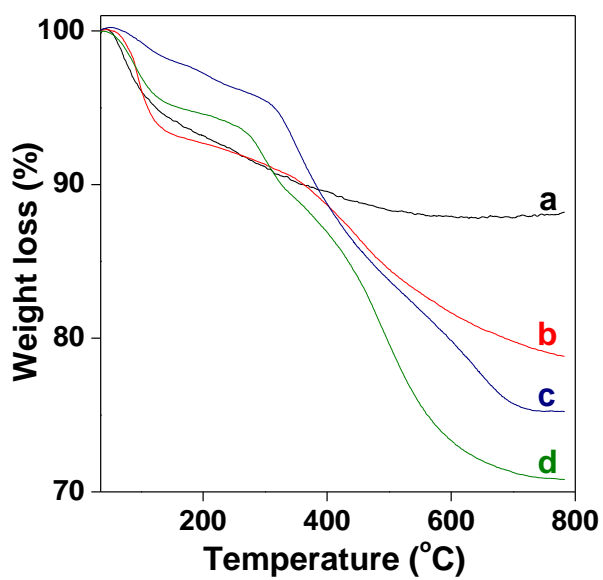

**Fig. s4** Thermogravimetric analysis of (a) SBA-15, (b) 3-APTES loaded SBA-15, (c) **TFMS** and (d) **RFMS**.

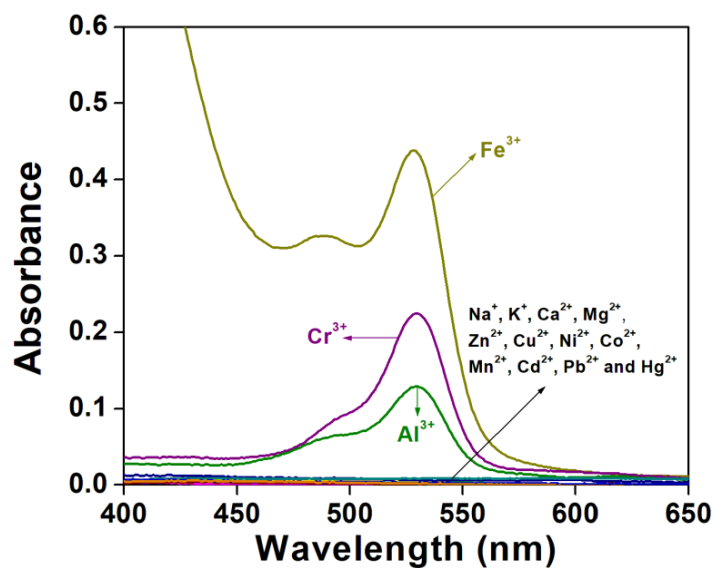

**Fig. s5** UV-vis spectra of **RFMS** (0.05 g/L) in absence and in the presence of different metal ions (120  $\mu\text{M}$ ) in water/ethanol (14:1, v/v) at room temperature.

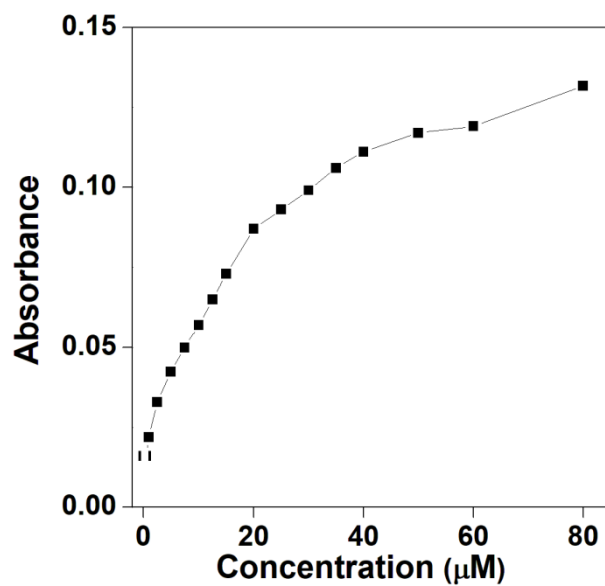

**Fig. s6** Plot of absorbance of **RFMS** (at 530 nm) versus concentration of  $\text{Al}^{3+}$  ion.

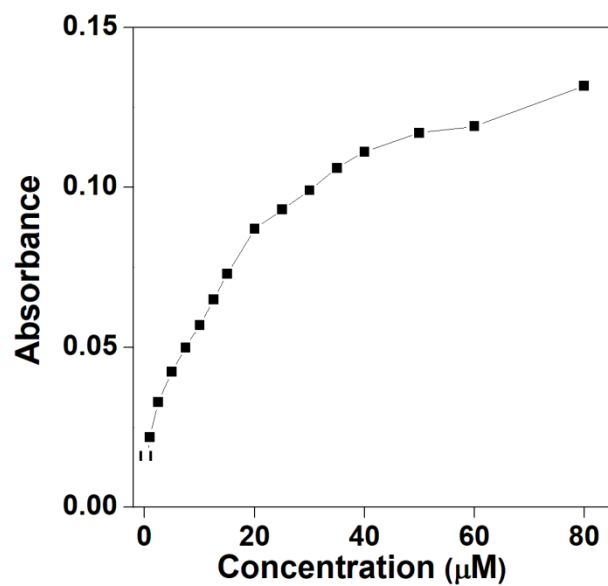

**Fig. s7** Plot of absorbance of **RFMS** (at 530 nm) versus concentration of  $\text{Cr}^{3+}$  ion.

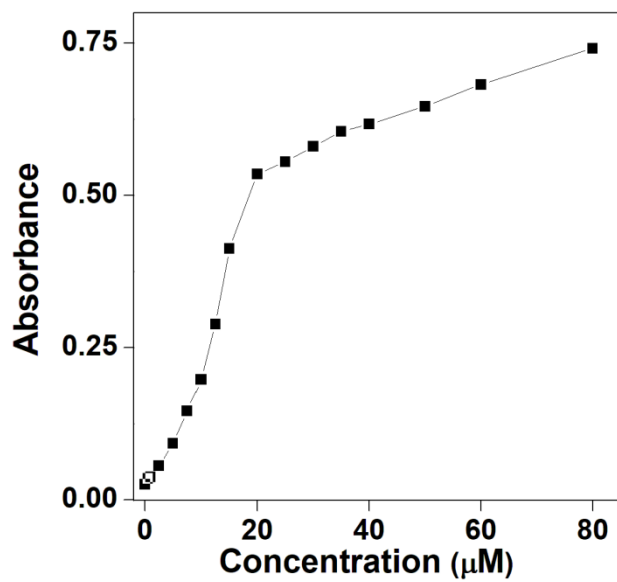

**Fig. s8** Plot of absorbance of **RFMS** (at 530 nm) versus concentration of  $\text{Fe}^{3+}$  ion.

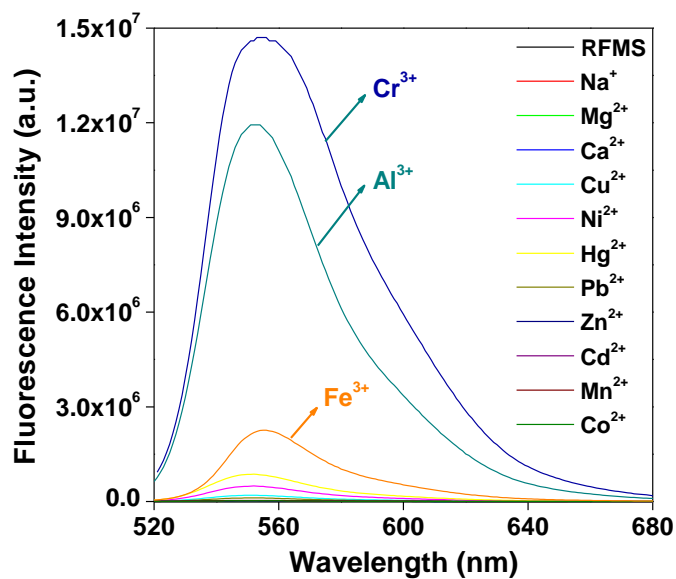

**Fig. s9** Fluorescence spectra of **RFMS** (0.05 g/L) in absence and in the presence of different metal ions (120  $\mu$ M) in water/ethanol (14:1, v/v) at room temperature.

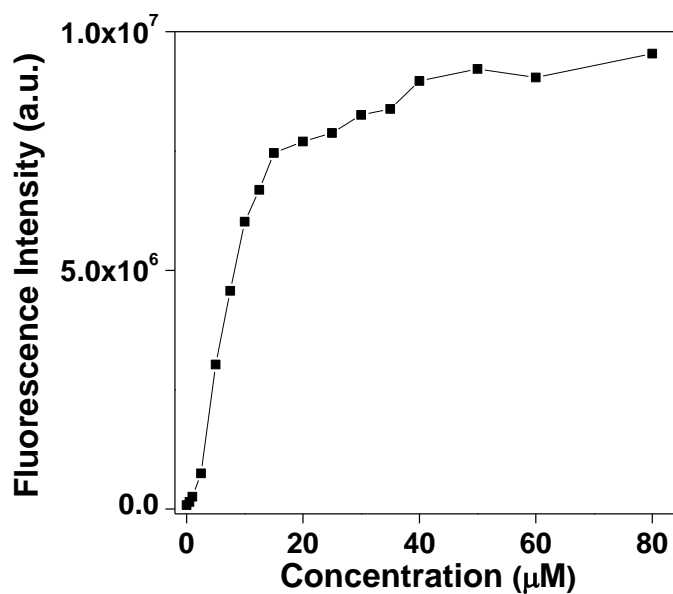

**Fig. s10** Plot of fluorescence intensity of **RFMS** (at 550 nm) versus concentration of  $\text{Al}^{3+}$  ion.

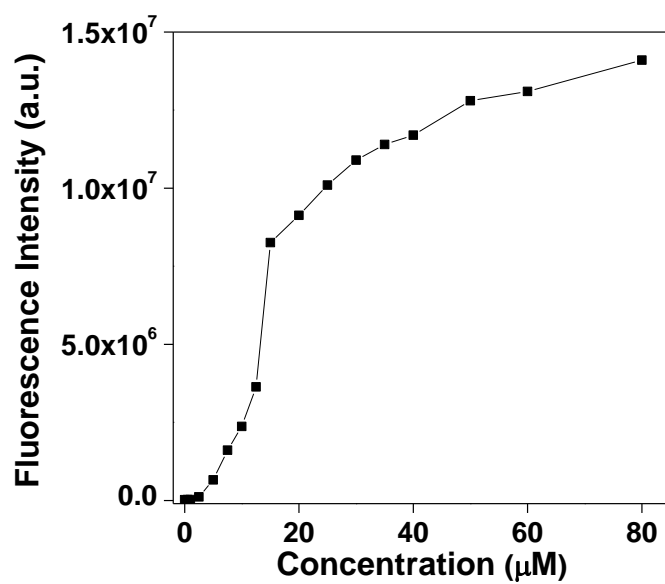

**Fig. s11** Plot of fluorescence intensity of **RFMS** (at 550 nm) versus concentration of  $\text{Cr}^{3+}$  ion.

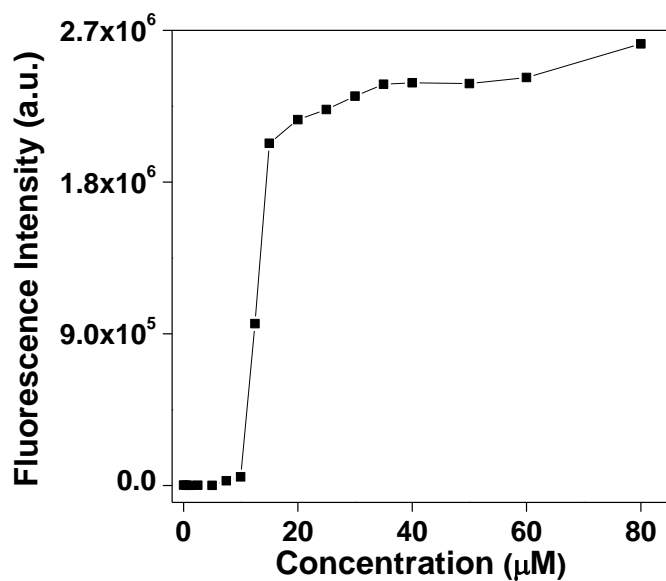

**Fig. s12** Plot of fluorescence intensity of **RFMS** (at 550 nm) versus concentration of  $\text{Fe}^{3+}$  ion.

### Determination of LOD of RFMS:

Limit of detection (LOD) for our probe has been determined by  $3\sigma$  method by the following equation:  $DL = K \cdot Sb1/S$ . Where  $K = 2$  or  $3$  ( $3$  in this case); here  $Sb1$  is the standard deviation of the blank solution (Fig. s13); and  $S$  is the slope of the calibration curve obtained from Linear dynamic plot of F.I. vs  $[M^{3+}]$   $\mu M$  (Fig. s14, s15 and s16).

Here  $Sb1 = 949.1195$ ,  $S = 526941.52$  (for  $Al^{3+}$ ),  $310077.16$  (for  $Cr^{3+}$ ) and  $3939.36$  (for  $Fe^{3+}$ ).

LOD of  $Al^{3+} = (3 \times 949.1195) / (541803.820) = 5.40$  nM

LOD of  $Cr^{3+} = (3 \times 949.1195) / (448979.334) = 9.18$  nM

LOD of  $Fe^{3+} = (3 \times 949.1195) / (4566.881) = 722.80$  nM

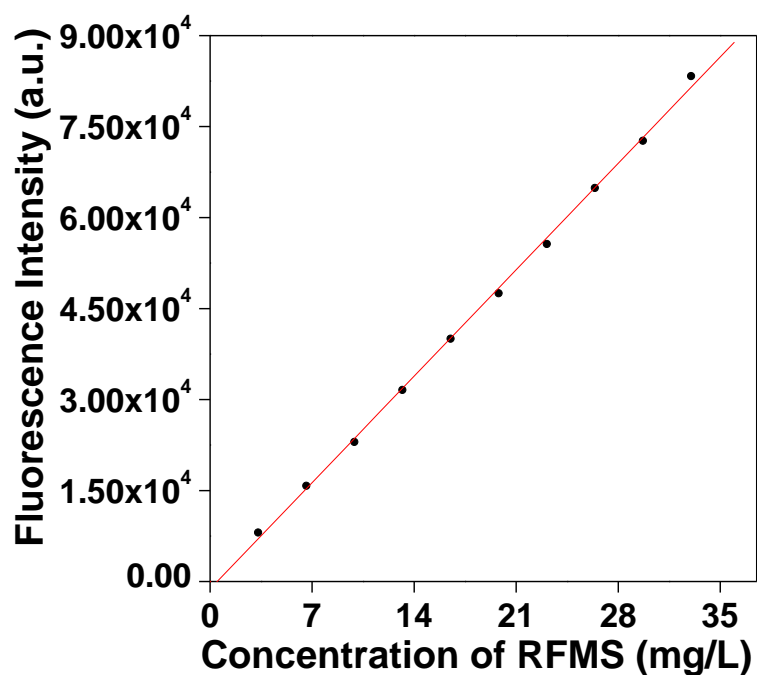

Fig. s13 Determination of  $Sb1$  of the blank, RFMS in solution.

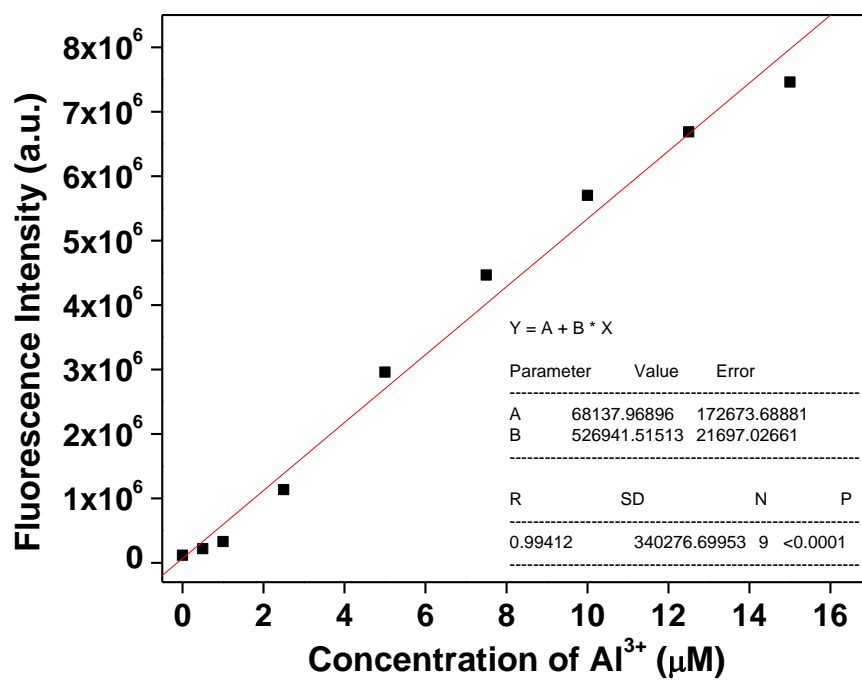

**Fig. s14** Linear dynamic plot of F.I. (at 550 nm) vs.  $[\text{Al}^{3+}]$  for the determination of S (slope).

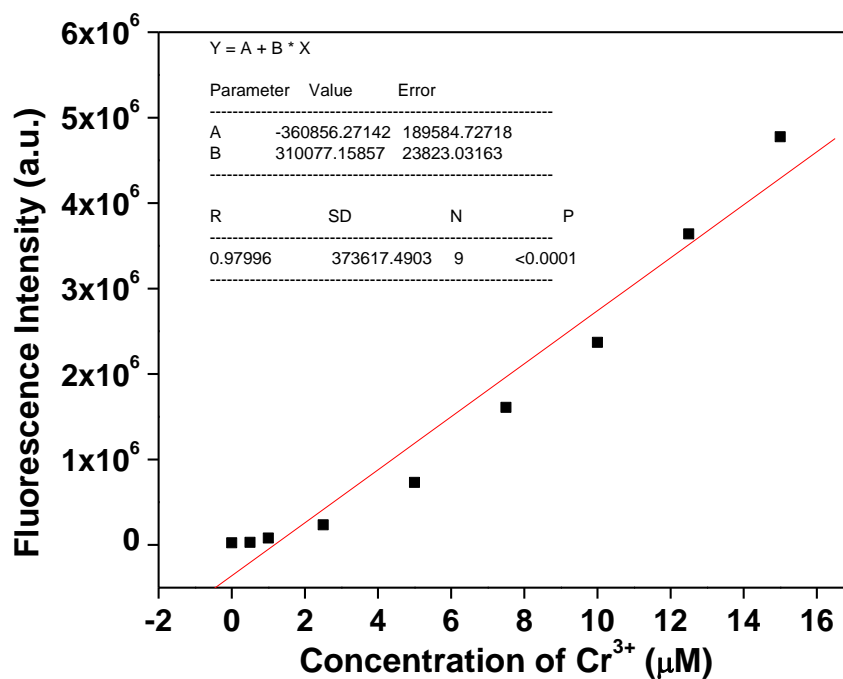

**Fig. s15** Linear dynamic plot of F.I. (at 550 nm) vs.  $[\text{Cr}^{3+}]$  for the determination of S (slope).

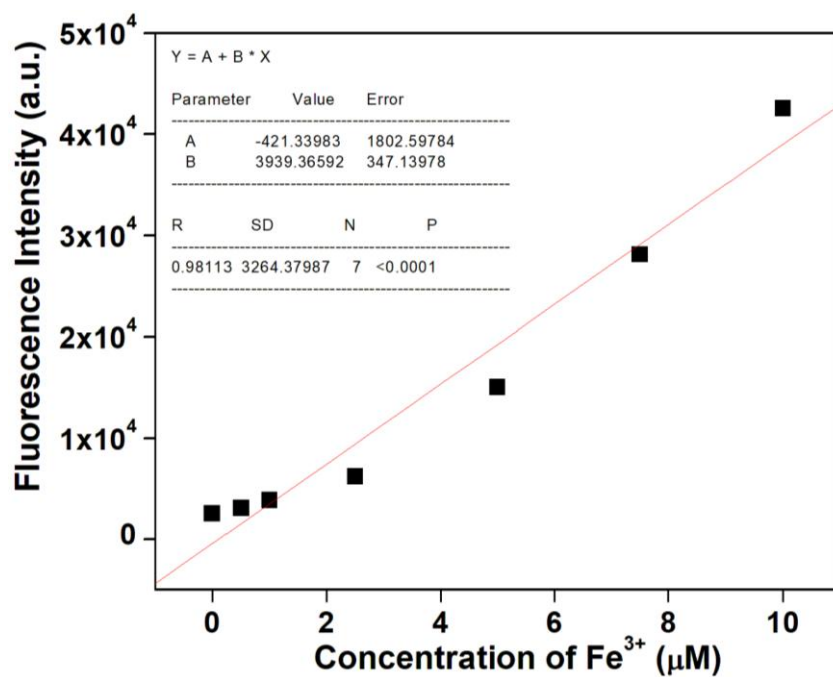

**Fig. s16** Linear dynamic plot of F.I. (at 550 nm) vs.  $[\text{Fe}^{3+}]$  for the determination of S (slope).

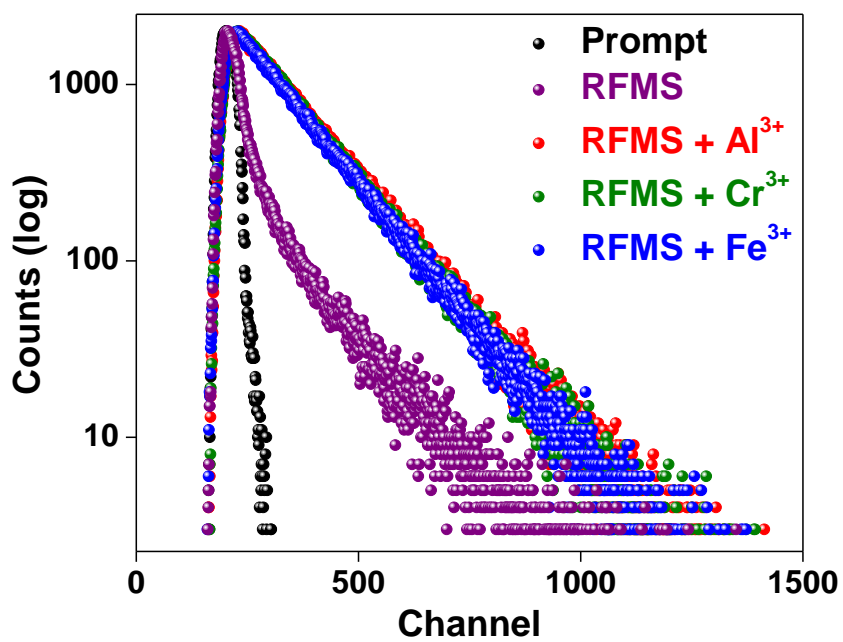

**Fig. s17** Excited state fluorescence decay behavior of **RFMS** and its complexes  $\text{Al}^{3+}$ ,  $\text{Cr}^{3+}$  and  $\text{Fe}^{3+}$  ions in ethanol/water mixture (1:14, v/v) at room temperature.

## Determination of various cations adsorbed on RFMS by Titrimetric Method

### Strength of the stock solutions:

- Zn-acetate = 1.002 (M/100)
- Lead nitrate = 1.001 (M/100)
- Potassium dichromate = 1.004 (N/100)
- Na<sub>2</sub>EDTA = 1.005 (M/100)

### Determination of Fe<sup>3+</sup>

Estimated by direct titration with potassium dichromate solution.

Volume of Potassium dichromate solution need for 25 mL of iron solution = 23.7 mL

Volume of Potassium dichromate solution need for 25 mL of iron solution treated with 0.10 g of RFMS = 15.4 mL

Therefore in 25 mL of iron solution Fe<sup>3+</sup> present = 0.01328 g

After treating with **RFMS** in 25 mL of iron solution Fe<sup>3+</sup> present = 0.00863 g

Amount of Fe<sup>3+</sup> adsorbed by 0.10 g of **RFMS** = 0.00465 g

### Determination of Zn<sup>2+</sup>

Estimated by direct titration with Na<sub>2</sub>EDTA solution.

Volume of Na<sub>2</sub>EDTA solution need for 25 mL of zinc solution = 23.1 mL

Volume of Na<sub>2</sub>EDTA solution need for 25 mL of zinc solution treated with 0.10 g of RFMS = 22 mL

Therefore in 25 mL of zinc solution, Zn<sup>2+</sup> present = 0.01517 g

After treating with 0.10 g of **RFMS** in 25 mL of zinc solution, Zn<sup>2+</sup> present = 0.01445 g

Amount of Zn<sup>2+</sup> adsorbed by 0.10 g of **RFMS** = 0.00072 g

### Determination of Pb<sup>2+</sup>

Estimated by back titration of excess Na<sub>2</sub>EDTA with zinc acetate solution. (25 mL metal ion + 50 mL Na<sub>2</sub>EDTA solution)

Volume of zinc acetate solution need for 25 mL of Pb<sup>2+</sup> solution = 25.6 mL

Volume of zinc acetate solution need for 25 mL of Pb<sup>2+</sup> solution treated with 0.10 g of RFMS = 26.2 mL

Therefore in 25 mL of lead solution  $\text{Pb}^{2+}$  present = 0.050333 g

After treating with 0.10 g of **RFMS** in 25 mL of lead solution  $\text{Pb}^{2+}$  present = 0.049827 g

Amount of  $\text{Pb}^{2+}$  adsorbed by 0.10 g of **RFMS** = 0.000503 g

**For mixture also 0.10 g of RFMS is taken in every case**

**Determination of  $\text{Pb}^{2+}$  and  $\text{Fe}^{3+}$  in a mixture**

Iron adsorbed = 0.0034 g

Lead adsorbed = 0.00221 g

**Determination of  $\text{Zn}^{2+}$  and  $\text{Fe}^{3+}$  in a mixture**

Iron adsorbed = 0.00425 g

Zinc adsorbed = 0.00121 g

**Table S1** Comparison of some parameters of some recently published related research works

| Sl No. | Probe                                                                               | Metal ion analyzed                                       | Excitation (nm)/<br>Emission (nm)                                                            | Fluorescence intensity enhancement | LOD (M)                                                                                                                                  | Linearity range                                                                                      | Application                         | Removal efficiency | Maximum uptake capacity          | Ref |
|--------|-------------------------------------------------------------------------------------|----------------------------------------------------------|----------------------------------------------------------------------------------------------|------------------------------------|------------------------------------------------------------------------------------------------------------------------------------------|------------------------------------------------------------------------------------------------------|-------------------------------------|--------------------|----------------------------------|-----|
| 1      | 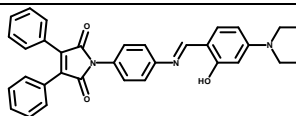   | Al <sup>3+</sup> , Cr <sup>3+</sup> and Fe <sup>3+</sup> | Colorimetric detection (color change: colorless to yellow); absorption band at 425 nm        |                                    | 2.16 × 10 <sup>-6</sup> (Al <sup>3+</sup> ), 1.27 × 10 <sup>-8</sup> (Cr <sup>3+</sup> ) and 5.03 × 10 <sup>-8</sup> (Fe <sup>3+</sup> ) | 0 to 30 μl (Al <sup>3+</sup> ), 0 to 60 μl (Cr <sup>3+</sup> ) and 0 to 60 μl (Fe <sup>3+</sup> )*** | Logic gate                          | ---                |                                  | 20  |
| 2      | 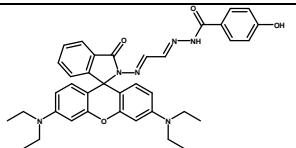   | Al <sup>3+</sup> , Cr <sup>3+</sup> and Fe <sup>3+</sup> | 480/583                                                                                      | --                                 | 0.22 × 10 <sup>-6</sup> (Al <sup>3+</sup> ), 0.63 × 10 <sup>-6</sup> (Cr <sup>3+</sup> ) and 0.14 × 10 <sup>-6</sup> (Fe <sup>3+</sup> ) | Not mentioned                                                                                        | No                                  | --                 | --                               | 21  |
| 3      | 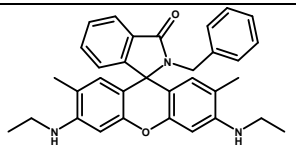   | Al <sup>3+</sup> , Cr <sup>3+</sup> and Fe <sup>3+</sup> | 502/558                                                                                      | 31 (Al)<br>26 (Cr)<br>41 (Fe)      | 1.34 × 10 <sup>-6</sup> (Al <sup>3+</sup> ), 2.28 × 10 <sup>-6</sup> (Cr <sup>3+</sup> ) and 1.28 × 10 <sup>-6</sup> (Fe <sup>3+</sup> ) | Not mentioned                                                                                        | (i) Logic gate<br>(ii) Cell imaging | --                 | --                               | 22  |
| 4      | 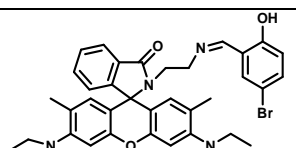  | Al <sup>3+</sup> , Cr <sup>3+</sup> and Fe <sup>3+</sup> | 500/552                                                                                      | 98 (Al) 50 (Cr) 38 (Fe)            | 1.18 × 10 <sup>-9</sup> (Al <sup>3+</sup> ), 1.80 × 10 <sup>-9</sup> (Cr <sup>3+</sup> ) and 4.04 × 10 <sup>-9</sup> (Fe <sup>3+</sup> ) | Not mentioned                                                                                        | Logic gate                          | --                 | --                               | 23  |
| 5      | 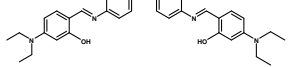 | Al <sup>3+</sup> , Cr <sup>3+</sup> and Fe <sup>3+</sup> | Colorimetric detection (color change: colorless to light yellow); absorption band at ~420 nm |                                    | 2.8 × 10 <sup>-7</sup> (Al <sup>3+</sup> ), 2.5 × 10 <sup>-7</sup> (Cr <sup>3+</sup> ) and 1. × 10 <sup>-7</sup> (Fe <sup>3+</sup> )     | Not mentioned                                                                                        | Logic gate                          | ---                |                                  | 40  |
| 6      | 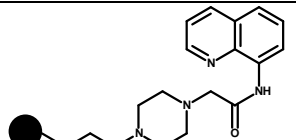 | Zn <sup>2+</sup>                                         | 360/509                                                                                      | --                                 | 1.08 × 10 <sup>-7</sup>                                                                                                                  | 0–6 μM                                                                                               | Removal of metal ion                | --                 | 157.2 mg/g (adsorption capacity) | 25a |

|    |                                                                                   |                                                          |         |                           |                                                                                                                                       |                                                                                                                                  |                                               |                                  |                                            |               |
|----|-----------------------------------------------------------------------------------|----------------------------------------------------------|---------|---------------------------|---------------------------------------------------------------------------------------------------------------------------------------|----------------------------------------------------------------------------------------------------------------------------------|-----------------------------------------------|----------------------------------|--------------------------------------------|---------------|
| 7  | 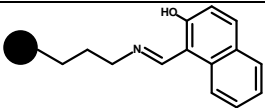 | $\text{Al}^{3+}$                                         | 325/427 | 8.5                       | $17.84 \times 10^{-6}$                                                                                                                | Not mentioned                                                                                                                    | Removal of metal ion                          | 87.4%                            | --                                         | 26            |
| 8  | 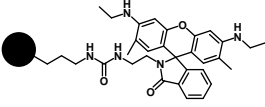 | $\text{Hg}^{2+}$                                         | 497/552 | --                        | $0.1 \times 10^{-9}$                                                                                                                  | 1.0–100.0 nM                                                                                                                     | Analysis of metal ion in real sample          | 109.5% recovery                  | --                                         | 27a           |
| 9  | 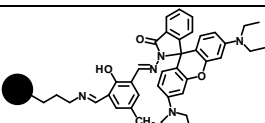 | $\text{Hg}^{2+}$                                         | 500/580 | --                        | $1.5 \times 10^{-8}$                                                                                                                  | Not mentioned                                                                                                                    | Logic gate                                    | --                               | --                                         | 27b           |
| 10 | 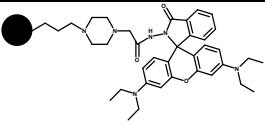 | $\text{Hg}^{2+}$                                         | 530/589 | --                        | $9.05 \times 10^{-7}$                                                                                                                 | $0-6 \times 10^{-5}$ M                                                                                                           | (i) Removal of metal ion<br>(ii) cell imaging | --                               | 115.47 mg/g (adsorption capacity)          | 28            |
| 11 | <b>RFMS</b>                                                                       | $\text{Al}^{3+}$ , $\text{Cr}^{3+}$ and $\text{Fe}^{3+}$ | 500/550 | 145 (Al) 174 (Cr) 30 (Fe) | $23.5 \times 10^{-9}$ ( $\text{Al}^{3+}$ ), $13.4 \times 10^{-9}$ ( $\text{Cr}^{3+}$ ) and $69.7 \times 10^{-9}$ ( $\text{Fe}^{3+}$ ) | 0-15 $\mu\text{M}$ ( $\text{Al}^{3+}$ ), 2.5-12.5 $\mu\text{M}$ ( $\text{Cr}^{3+}$ ) and 0-10 $\mu\text{M}$ ( $\text{Fe}^{3+}$ ) | Removal of metal ion                          | 97.28 (Al) 97.06 (Cr) 96.87 (Fe) | 11.20 (Al), 19.72 (Cr) and 21.55 (Fe) mg/g | Present study |

\*\*\* Stock solution of the metal ion is  $1 \times 10^{-3}$  M
